# Supplementary material for: Sex-Specific Differences in Primary CNS Lymphoma
Source: MDPI journal article supplement (doi:10.3390/cancers12061593), 2020-06-16
Supplement: s1 [file s1]

# Supplementary Materials: Sex-Specific Differences in Primary CNS Lymphoma

Thomas Roetzer, Julia Furtner, Johanna Gesperger, Lukas Seebrecht, Dave Bandke, Martina Brada, Tanisa Brandner-Kokalj, Astrid Grams, Johannes Haybaeck, Melitta Kitzwoegerer, Stefan L. Leber, Franz Marhold, Patrizia Moser, Camillo Sherif, Johannes Trenkler, Julia Unterluggauer, Serge Weis, Franz Wuertz, Johannes A. Hainfellner, Georg Langs, Karl-Heinz Nenning and Adelheid Woehrer

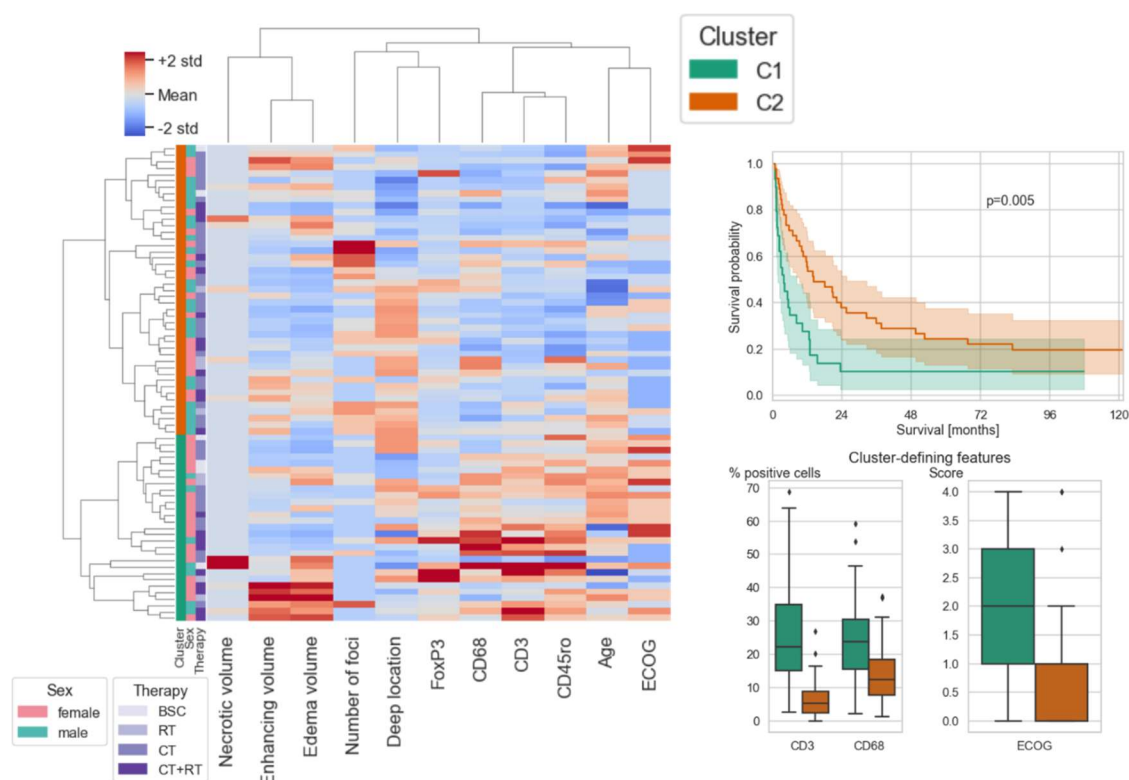

**Figure S1.** Clustering results for the whole patient cohort.

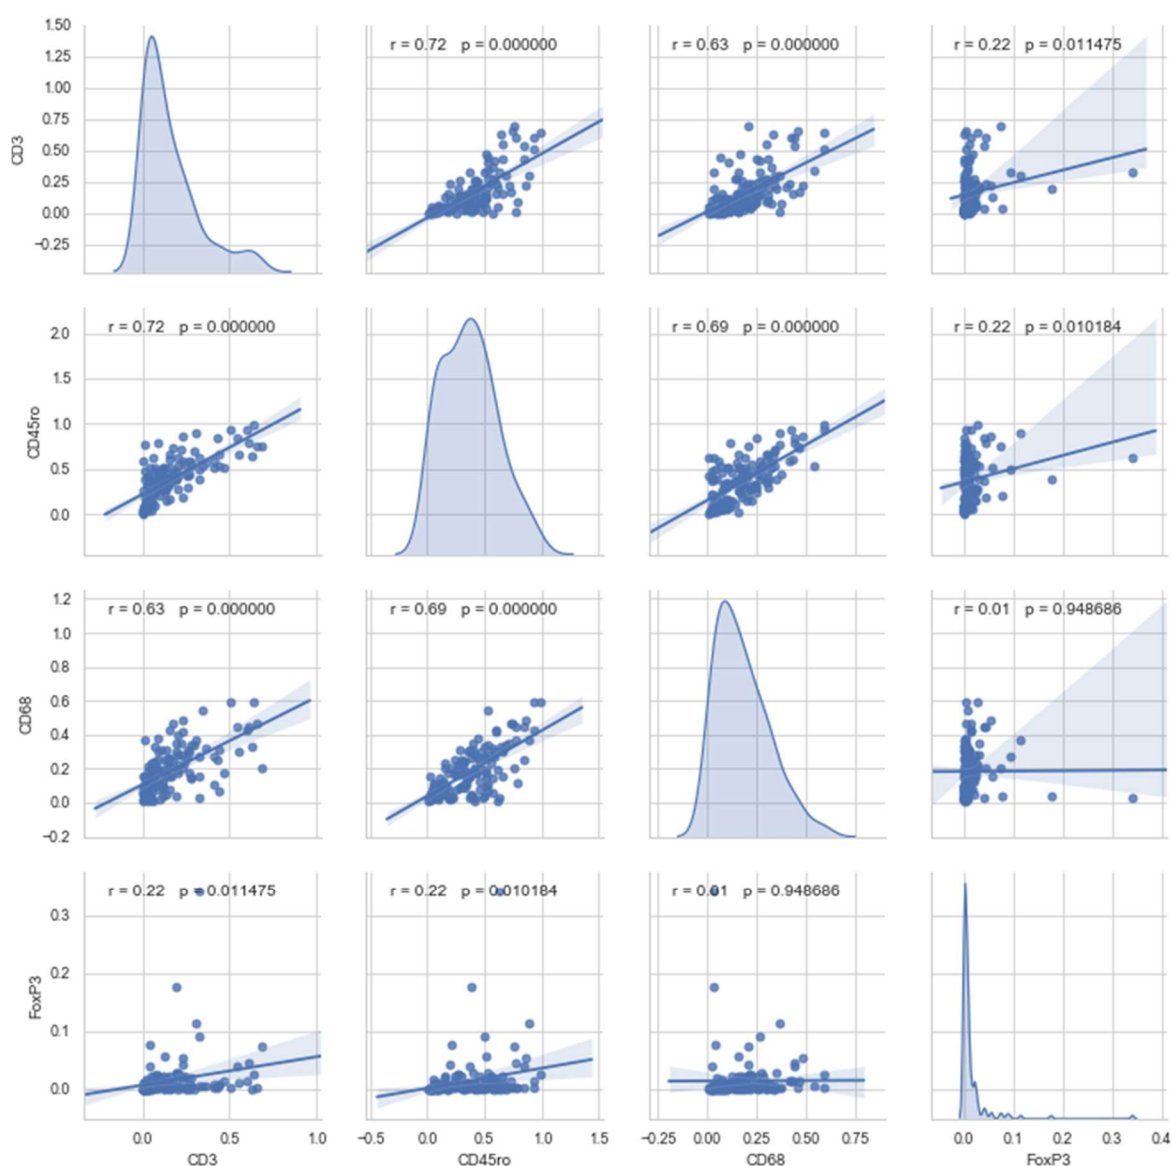

**Figure S2.** Distribution and correlations of different immunohistochemical markers on the same tissue microarrays (TMA) tissue core.

**Table S1.** Cluster comparisons. P-values were calculated with ANOVA (continuous variables) or Kruskal–Wallis *H*-tests (ordinal variables).

| Female Patients  |                           |                            |                           |         |
|------------------|---------------------------|----------------------------|---------------------------|---------|
|                  | fc1                       | fc2                        | fc3                       | p-Value |
| Age              | 53.5 ±10.7yrs             | 68.7 ±11.9yrs              | 68.6 ±11.6yrs             | <0.01   |
| ECOG             | 0 (0-1)                   | 2 (2-2)                    | 2 (0-3)                   | <0.01   |
| Enhancing volume | 10.6 ±8.2cm <sup>3</sup>  | 64.9 ±22.0cm <sup>3</sup>  | 12.0 ±9.2cm <sup>3</sup>  | <0.01   |
| Edema volume     | 77.1 ±68.7cm <sup>3</sup> | 233.1 ±56.8cm <sup>3</sup> | 73.0 ±49.8cm <sup>3</sup> | <0.01   |
| Necrotic volume  | 1.3 ±4.0cm <sup>3</sup>   | 0.1 ±0.2cm <sup>3</sup>    | 0.1 ±0.3cm <sup>3</sup>   | <0.01   |
| Deep location    | 54.3 ±26.2%               | 45.3 ±14.2%                | 66.7 ±31.8%               | <0.01   |

|                |             |             |             |       |
|----------------|-------------|-------------|-------------|-------|
| Number of foci | 2 (1-3)     | 1 (1-1)     | 1 (1-1)     | <0.01 |
| CD3            | 4.3 ±3.4%   | 18.1 ±14.5% | 18.4 ±11.7% | <0.01 |
| CD45ro         | 17.1 ±11.3% | 38.7 ±17.7% | 51.7 ±16.6% | <0.01 |
| FoxP3          | 0.4 ±0.5%   | 0.7 ±0.5%   | 1.1 ±2.0%   | <0.01 |
| CD68           | 11.6 ±7.6%  | 11.8 ±4.7%  | 25.8 ±12.4% | <0.01 |

**Male patients**

|                  | mC1                         | mC2                          | <i>p</i> -value |
|------------------|-----------------------------|------------------------------|-----------------|
| Age              | 47.9 ± 13.3yrs              | 67.4 ± 9.5yrs                | <0.01           |
| ECOG             | 1 (1–2)                     | 1 (1–1)                      | <0.01           |
| Enhancing volume | 4.1 ± 2.7 cm <sup>3</sup>   | 24.4 ± 12.9 cm <sup>3</sup>  | <0.01           |
| Edema volume     | 20.7 ± 12.3 cm <sup>3</sup> | 113.0 ± 56.8 cm <sup>3</sup> | <0.01           |
| Necrotic volume  | 0.2 ± 0.5 cm <sup>3</sup>   | 0.3 ± 0.8 cm <sup>3</sup>    | <0.01           |
| Deep location    | 80.8 ± 32.0%                | 49.4 ± 30.8%                 | <0.01           |
| Number of foci   | 2 (1–2)                     | 2 (1–3)                      | <0.01           |
| CD3              | 4.3 ± 3.3%                  | 13.7 ± 12.8%                 | <0.01           |
| CD45ro           | 16.6 ± 9.7%                 | 35.0 ± 18.8%                 | <0.01           |
| FoxP3            | 0.9 ± 0.9%                  | 0.5 ± 0.6%                   | <0.01           |
| CD68             | 12.5 ± 7.4%                 | 15.5 ± 9.1%                  | <0.01           |

**All patients**

|                  | C1                          | C2                           | <i>p</i> -value |
|------------------|-----------------------------|------------------------------|-----------------|
| Age              | 60.8 ± 13.2 yrs             | 67.1 ± 14.2 yrs              | 0.06            |
| ECOG             | 1 (0–1)                     | 2 (1–3)                      | <0.01           |
| Enhancing volume | 17.0 ± 13.9 cm <sup>3</sup> | 24.0 ± 25.9 cm <sup>3</sup>  | 0.14            |
| Edema volume     | 82.7 ± 58.1 cm <sup>3</sup> | 119.7 ± 92.3 cm <sup>3</sup> | 0.04            |
| Necrotic volume  | 0.2 ± 0.6 cm <sup>3</sup>   | 0.9 ± 3.0 cm <sup>3</sup>    | 0.16            |
| Deep location    | 60.0 ± 31.7%                | 57.1 ± 31.6%                 | 0.71            |
| Number of foci   | 2 (1–3)                     | 1 (1–1)                      | <0.01           |
| CD3              | 7.0 ± 6.0%                  | 28.0 ± 17.6%                 | <0.01           |
| CD45ro           | 27.1 ± 16.9%                | 54.6 ± 20.3%                 | <0.01           |
| FoxP3            | 0.6 ± 0.8%                  | 1.5 ± 2.1%                   | 0.01            |

CD68

14.2 ± 9.1%

25.2 ± 13.9%

&lt;0.01

**Table S2.** Split-points and survival for dichotomized variables obtained by RPA. mOS: median overall survival.

|                     | Female Patients       |    |             |         | Male Patients         |    |             |         | All Patients          |    |             |         |
|---------------------|-----------------------|----|-------------|---------|-----------------------|----|-------------|---------|-----------------------|----|-------------|---------|
|                     | Groups                | n  | mOS         | p       | Groups                | n  | mOS         | p       | Groups                | n  | mOS         | p       |
| Age                 | ≤64 years             | 12 | not reached | <0.0001 | ≤59.5 years           | 8  | not reached | 0.00038 | ≤59.5 years           | 18 | not reached | <0.0001 |
|                     | >64 years             | 19 | 4.21 months |         | >59.5 years           | 17 | 5.59 months |         | >59.5 years           | 38 | 5.51 months |         |
| ECOG                | ≤1.5                  | 20 | 12.5 months | 0.024   | ≤1.5                  | 18 | 17.4 months | 0.021   | ≤1.5                  | 38 | 13.5 months | 0.0012  |
|                     | >1.5                  | 11 | 4.21 months |         | >1.5                  | 7  | 4.7 months  |         | >1.5                  | 18 | 4.45 months |         |
| Enhancing volume    | ≤16.3 cm <sup>3</sup> | 17 | 7.13 months | 0.23    | ≤5.54 cm <sup>3</sup> | 7  | 37.7 months | 0.086   | ≤1.99 cm <sup>3</sup> | 9  | 82.9 months | 0.058   |
|                     | >16.3 cm <sup>3</sup> | 14 | 16.8 months |         | >5.54 cm <sup>3</sup> | 18 | 6.92 months |         | >1.99 cm <sup>3</sup> | 47 | 10.1 months |         |
| Necrotic volume     | ≤0 cm <sup>3</sup>    | 26 | 11.3 months | 0.44    | ≤0 cm <sup>3</sup>    | 22 | 13 months   | 0.31    | ≤0.05 cm <sup>3</sup> | 49 | 11.9 months | 0.81    |
|                     | >0 cm <sup>3</sup>    | 5  | 9.21 months |         | >0 cm <sup>3</sup>    | 3  | 1.41 months |         | >0.05 cm <sup>3</sup> | 7  | 9.21 months |         |
| Edema volume        | ≤55.3 cm <sup>3</sup> | 13 | 13 months   | 0.11    | ≤23.9 cm <sup>3</sup> | 7  | 37.7 months | 0.13    | ≤29 cm <sup>3</sup>   | 13 | 37.7 months | 0.12    |
|                     | >55.3 cm <sup>3</sup> | 18 | 9.63 months |         | >23.9 cm <sup>3</sup> | 18 | 9.95 months |         | >29 cm <sup>3</sup>   | 43 | 10.5 months |         |
| Left location       | ≤49.5%                | 14 | 9.63 months | 0.32    | ≤58.5%                | 16 | 5.44 months | 0.071   | ≤50.5%                | 29 | 5.88 months | 0.042   |
|                     | >49.5%                | 17 | 13 months   |         | >58.5%                | 9  | 25.5 months |         | >50.5%                | 27 | 15.4 months |         |
| Cerebellar location | ≤0%                   | 27 | 10.5 months | 0.36    | ≤2%                   | 18 | 14.1 months | 0.31    | ≤22%                  | 49 | 12 months   | 0.45    |
|                     | >0%                   | 4  | 4.21 months |         | >2%                   | 7  | 5.59 months |         | >22%                  | 7  | 5.59 months |         |
| Frontal location    | ≤2.5%                 | 17 | 7.13 months | 0.046   | ≤13%                  | 13 | 11.6 months | 0.16    | ≤2.5%                 | 30 | 8.73 months | 0.015   |
|                     | >2.5%                 | 14 | 35.3 months |         | >13%                  | 12 | 31.9 months |         | >2.5%                 | 26 | 33.9 months |         |
| Temporal location   | ≤7.5%                 | 23 | 12 months   | 0.29    | ≤0.5%                 | 16 | 12.8 months | 0.63    | ≤7.5%                 | 47 | 12 months   | 0.26    |
|                     | >7.5%                 | 8  | 7.55 months |         | >0.5%                 | 9  | 11.9 months |         | >7.5%                 | 9  | 9.21 months |         |
| Parietal location   | ≤6%                   | 19 | 9.21 months | 0.37    | ≤1%                   | 14 | 14.5 months | 0.38    | ≤1%                   | 29 | 13 months   | 0.53    |
|                     | >6%                   | 12 | 11.7 months |         | >1%                   | 11 | 11.9 months |         | >1%                   | 27 | 10.5 months |         |
| Occipital location  | ≤0%                   | 25 | 10.5 months | 0.57    | ≤0.5%                 | 18 | 9.95 months | 0.87    | ≤1.5%                 | 46 | 11.1 months | 0.46    |
|                     | >0%                   | 6  | 11.5 months |         | >0.5%                 | 7  | 20.7 months |         | >1.5%                 | 10 | 12.4 months |         |
| Deep location       | ≤30%                  | 7  | 9.21 months | 0.1     | ≤85.5%                | 15 | 14.1 months | 0.2     | ≤88.5%                | 42 | 13 months   | 0.086   |
|                     | >30%                  | 24 | 11.8 months |         | >85.5%                | 10 | 6.92 months |         | >88.5%                | 14 | 6.36 months |         |
| Number of foci      | ≤1.5                  | 18 | 8.6 months  | 0.29    | ≤2.5                  | 17 | 8.25 months | 0.43    | ≤3.5                  | 49 | 10.5 months | 0.22    |
|                     | >1.5                  | 13 | 12 months   |         | >2.5                  | 8  | 16.3 months |         | >3.5                  | 7  | 11.9 months |         |
| CD3                 | ≤3.37%                | 7  | NA months   | 0.039   | ≤16.6%                | 18 | 17.4 months | 0.29    | ≤15.7%                | 39 | 14 months   | 0.058   |
|                     | >3.37%                | 24 | 9.63 months |         | >16.6%                | 7  | 5.59 months |         | >15.7%                | 17 | 5.59 months |         |

|        |         |    |             |       |        |    |             |      |          |    |             |       |
|--------|---------|----|-------------|-------|--------|----|-------------|------|----------|----|-------------|-------|
| CD45ro | ≤33.6%  | 17 | 18.2 months | 0.027 | ≤18%   | 7  | 37.7 months | 0.25 | ≤7.14%   | 8  | 67.6 months | 0.025 |
|        | >33.6%  | 14 | 5.31 months |       | >18%   | 18 | 9.95 months |      | >7.14%   | 48 | 9.63 months |       |
| CD68   | ≤19.5%  | 19 | 12.9 months | 0.21  | ≤20.3% | 18 | 13 months   | 0.31 | ≤27.2%   | 49 | 12 months   | 0.11  |
|        | >19.5%  | 12 | 4.87 months |       | >20.3% | 7  | 8.25 months |      | >27.2%   | 7  | 2.86 months |       |
| FoxP3  | ≤0.141% | 7  | not reached | 0.049 | ≤1.01% | 18 | 11.8 months | 0.16 | ≤0.141 % | 15 | 37.7 months | 0.15  |
|        | >0.141% | 24 | 9.63 months |       | >1.01% | 7  | 49.6 months |      | >0.141 % | 41 | 9.21 months |       |

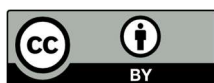

© 2020 by the authors. Licensee MDPI, Basel, Switzerland. This article is an open access article distributed under the terms and conditions of the Creative Commons Attribution (CC BY) license (<http://creativecommons.org/licenses/by/4.0/>).
